# Supplementary material for: Heterogeneity of axial spondyloarthritis: genetics, sex and structural damage matter
Source: PubMed Central journal article supplement — RMD Open. 2022 May 6;8(1):e002302. doi: 10.1136/rmdopen-2022-002302 (PMC9083385; doi:10.1136/rmdopen-2022-002302), 2022-05-06

Supplementary Figure 1a

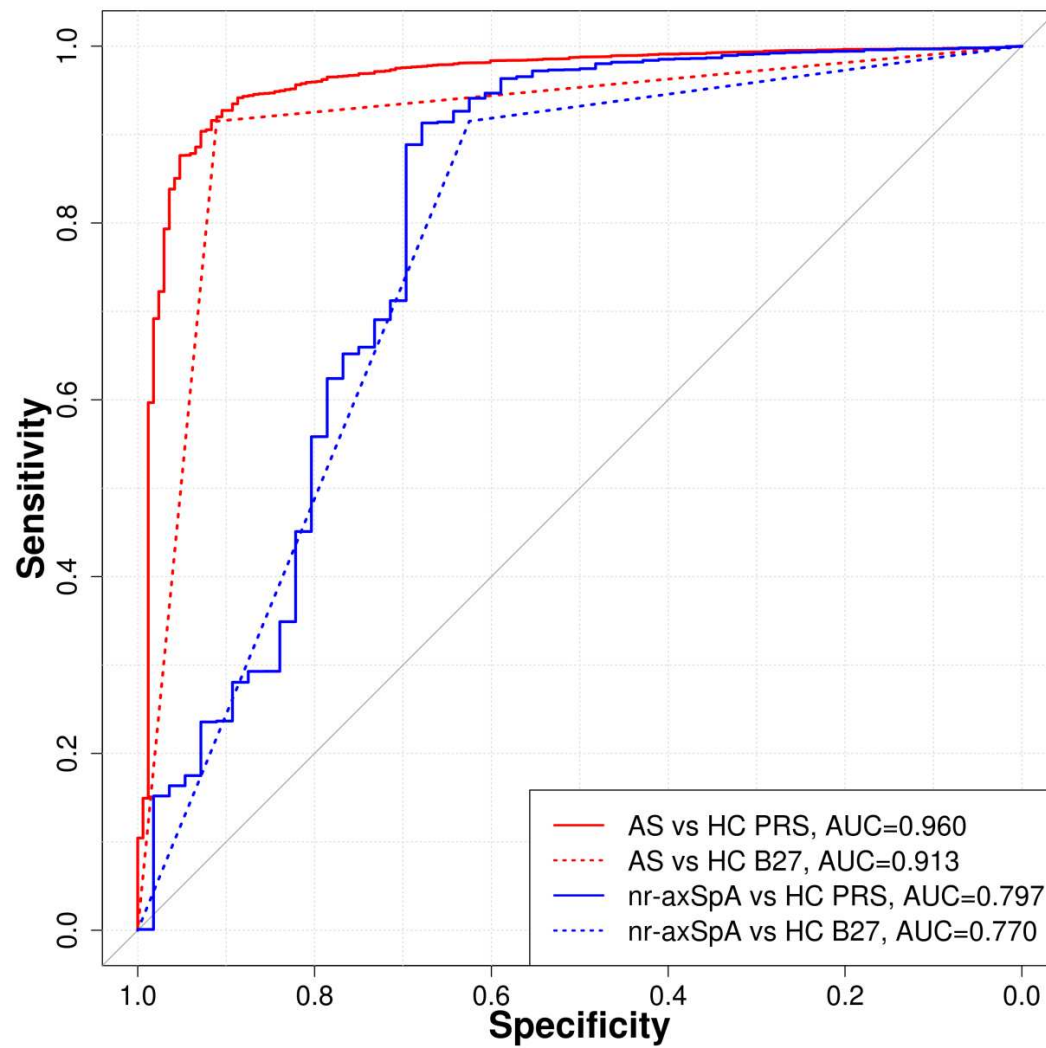

Supplementary Figure 1b

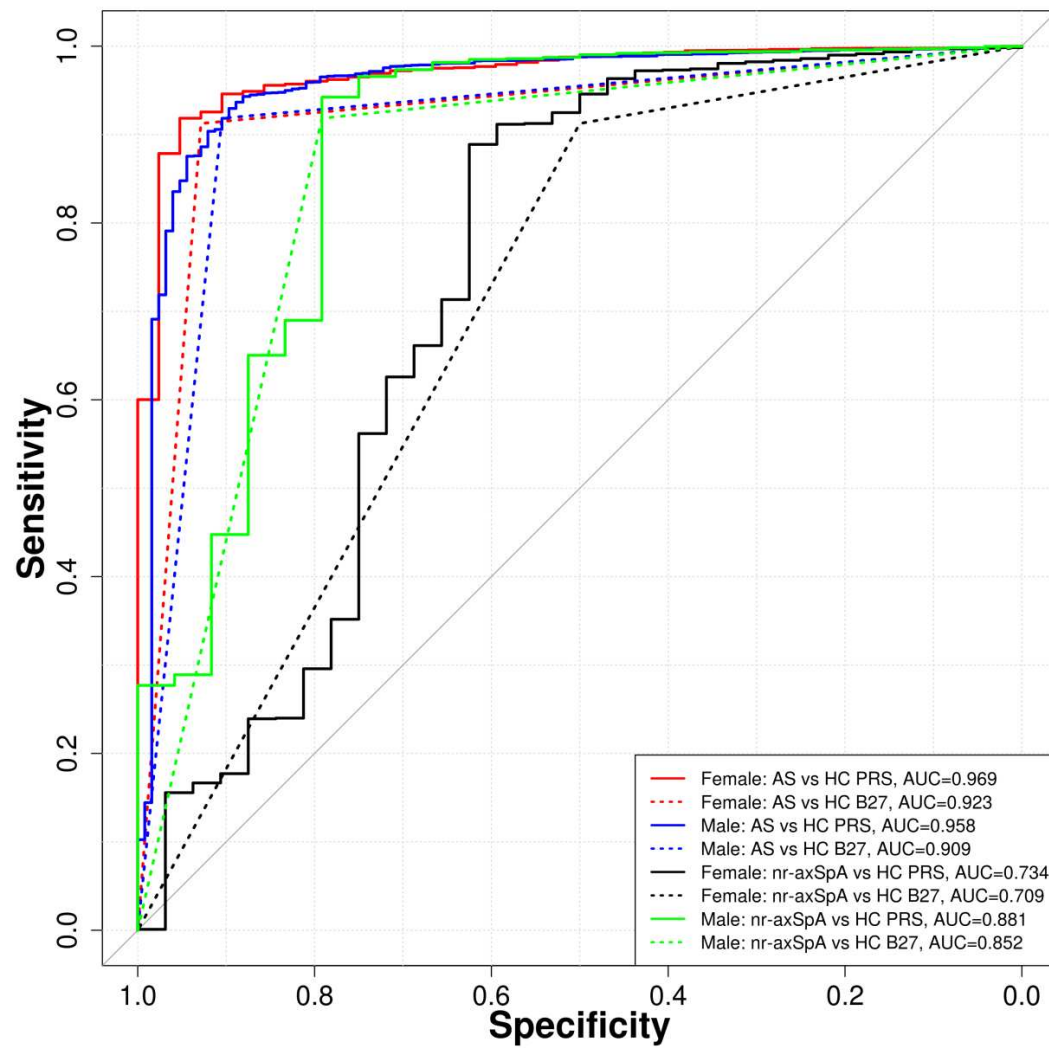

Supplementary Figure 2a

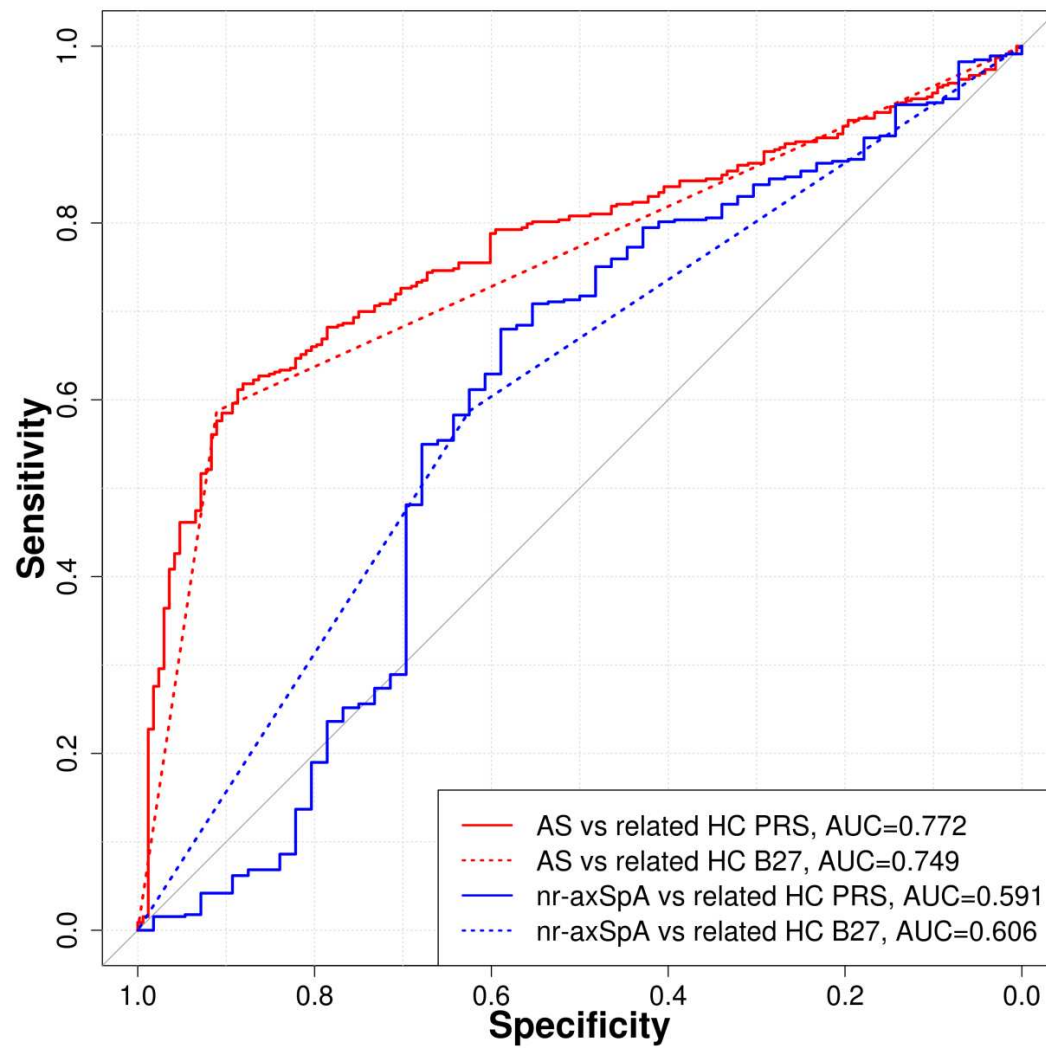

Supplementary Figure 2b

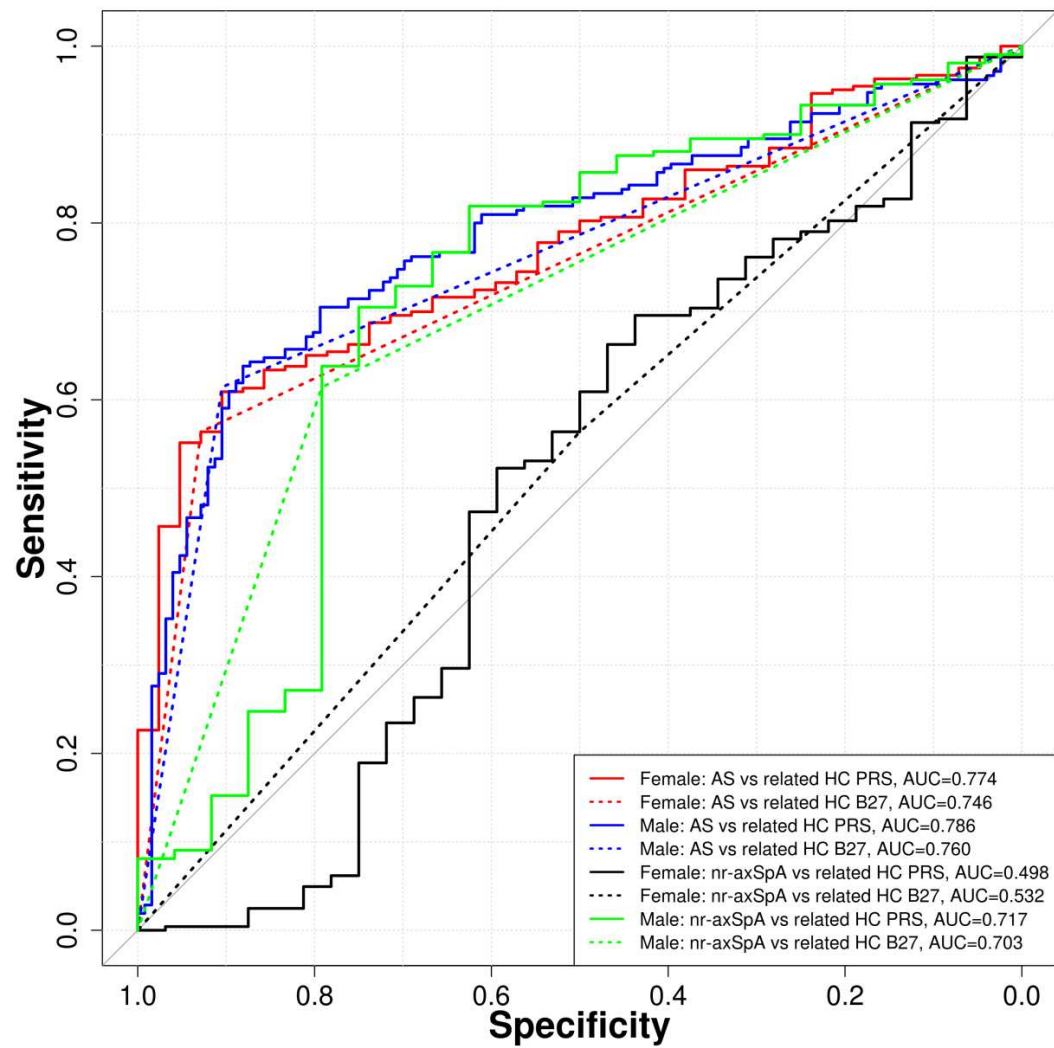

Supplement: rmdopen-2022-002302supp001.pdf [file rmdopen-2022-002302supp001.pdf]
